# Supplementary material for: Highly uniform NaLa(MoO4)2:Ln3+ (Ln = Eu, Dy) microspheres: template-free hydrothermal synthesis, growing mechanism, and luminescent properties
Source: Royal Society of Chemistry journal article supplement (doi:10.1039/c2ce06682c), 2012-01-01
Supplement: c2ce06682c.pdf [file c2ce06682c.pdf]

## Supplementary Information

### **Highly uniform NaLa(MoO<sub>4</sub>)<sub>2</sub>:Ln<sup>3+</sup> (Ln = Eu, Dy) microspheres: template-free hydrothermal synthesis, growing mechanism, and luminescent properties**

**Wanwan Xia,<sup>ab</sup> Zuoling Fu,<sup>\*ab</sup> Qisong Li,<sup>ab</sup> Xiaoyun Cui<sup>ab</sup> and Wenhao Li<sup>\*c</sup>**

*<sup>a</sup>State Key Laboratory of Superhard Materials, College of Physics, Jilin University, Changchun 130012, China*

*<sup>b</sup>Key Lab of Coherent Light, Atomic and Molecular Spectroscopy, Ministry of Education, Changchun 130012, China*

*<sup>c</sup>Changchun Institute of Optics, Fine Mechanics and Physics, Chinese Academy of Sciences, Changchun 130033, China*

*E-mail: [zlfu@jlu.edu.cn](mailto:zlfu@jlu.edu.cn) (Z. L.Fu) and [leewenho@163.com](mailto:leewenho@163.com) (W. H. Li)*

*Telephone: 86-431-85167966*

*Fax: 86-431-85167966*

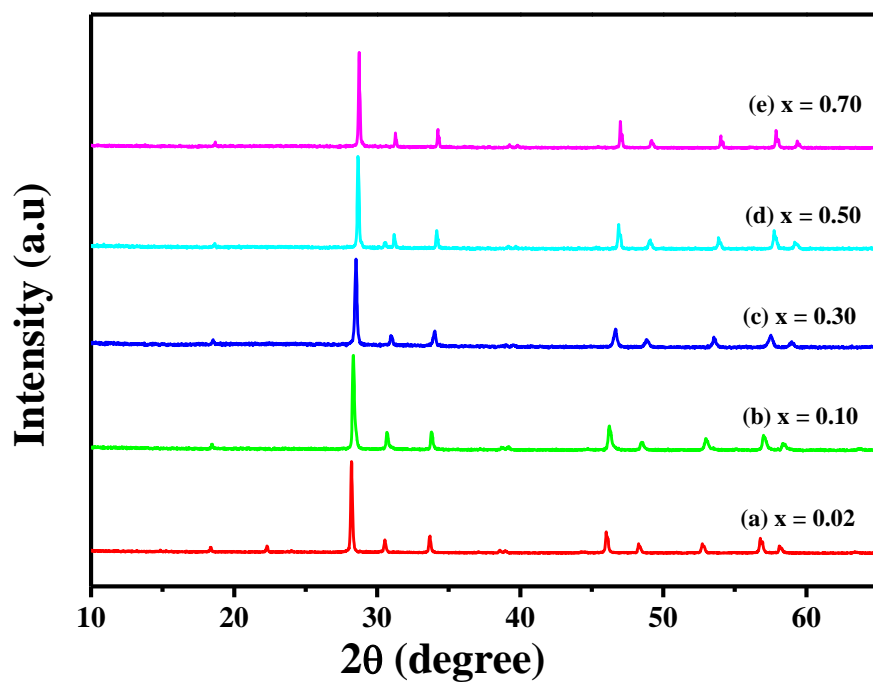

**Fig. S1** XRD patterns of  $\text{NaLa}_{1-x}(\text{MoO}_4)_2 \cdot x \text{Eu}^{3+}$  samples prepared by hydrothermal method at  $180^\circ\text{C}$  for 12 h with different doping concentrations ( $x = 0.02, 0.10, 0.30, 0.50, 0.70$ ).
